# Supplementary material for: Human lupus autoantibody–DNA complexes activate DCs through cooperation of CD32 and TLR9
Source: JCI journal article supplement (doi:10.1172/jci23025), 2005-01-20
Supplement: sd1 [file 1]

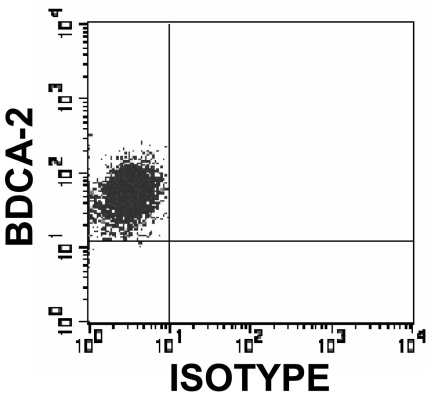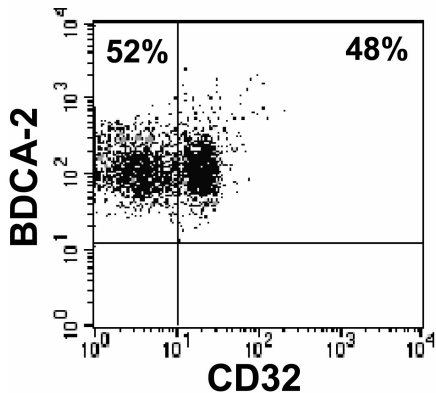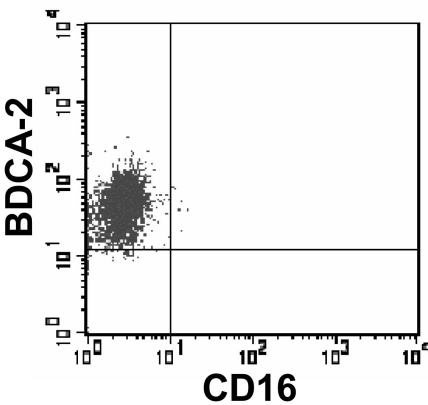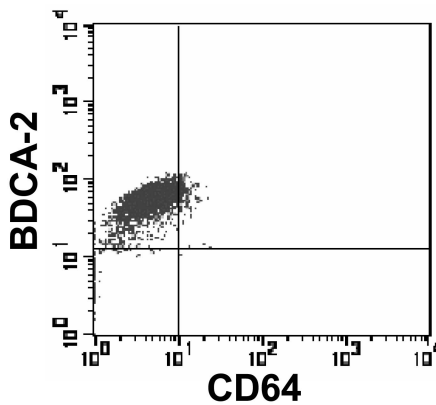

Retroviral TLR9<sup>YFP</sup> in U373 treated with SLE-IC<sup>alexa</sup>

untreated

5 minutes

overlay

SLE-IC

TLR9

5 minutes

30 minutes

overlay

SLE-IC

TLR9

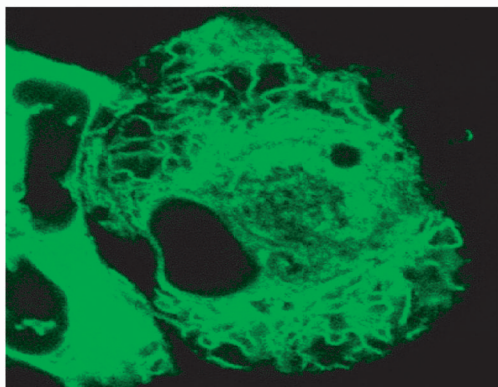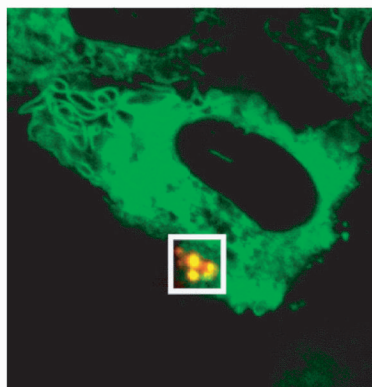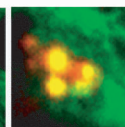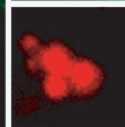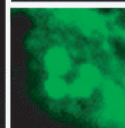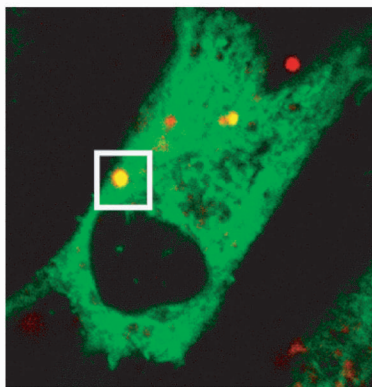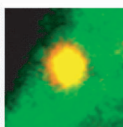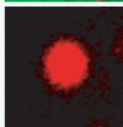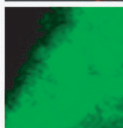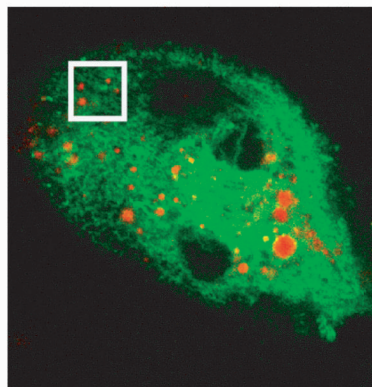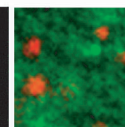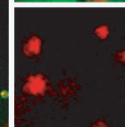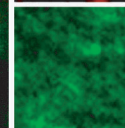

| Patient ID# | HEp-2 ANA test, staining pattern | anti-DNA Crithidia luciliae | anti-DNA ELISA | C1q ELISA | IgG1, IgG2, IgG3, IgG4 subclass | Disease type         |
|-------------|----------------------------------|-----------------------------|----------------|-----------|---------------------------------|----------------------|
| SLE1        | 1:5120, homogeneous              | 1:100                       | +++            | +++       | 76%, 21%, 0%, 0%                | SLE                  |
| SLE2        | 1:1280, homogeneous              | 1:320                       | +++            | +++       | 65%, 11%, 24%, 0%               | SLE, renal disease   |
| SLE3        | 1:2560, speckled                 | 1:160                       | ++             | ++        | 62%, 22%, 18%, 3%               | SLE                  |
| SLE4        | 1:5120, homogenous               | 1:320                       | ++             | +++       | 44%, 34%, 21%, 0%               | SLE, renal disease   |
| SLE5        | 1:2560, homogeneous              | 1:320                       | ++             | ++        | 59%, 32%, 9%, 0%                | SLE                  |
| SLE6        | 1:640, speckled                  | 1:160                       | ++             | +++       | 62%, 27%, 10%, 0%               | SLE                  |
| SLE7        | 1:5120, homogenous               | 1:640                       | +++            | +++       | 57%, 39%, 0%, 1%                | SLE                  |
| SLE8        | 1:1280, homogeneous              | 1:80                        | +              | +         | 71%, 19, 9%, 0%                 | SLE                  |
| SLE9        | 1:1280, homogeneous              | 1:160                       | ++             | ++        | 66%, 30%, 2%, 2%                | SLE, renal disease   |
| SLE10       | 1:5120, speckled                 | 1:320                       | +++            | ++        | 71%, 29%, 0%, 0%                | SLE, renal disease   |
| SLE11       | 1:640, speckled                  | 1:160                       | ++             | ++        | 60%, 22%, 13%, 4%               | SLE                  |
| SLE12       | 1:2560, homogeneous              | 1:160                       | ++             | +         | 79%, 20%, 0%, 0%                | SLE                  |
| SJO1        | 1:2560, speckled                 | NEGATIVE                    | NEGATIVE       | ++        |                                 | Sjogren Syndrome     |
| SJO2        | 1:640, homogeneous               | NEGATIVE                    | NEGATIVE       | ++        |                                 | Sjogren Syndrome     |
| SJO3        | 1:1280, homogeneous              | NEGATIVE                    | NEGATIVE       | +         |                                 | Sjogren Syndrome     |
| SJO4        | 1:640, homogeneous               | NEGATIVE                    | NEGATIVE       | ++        |                                 | Sjogren Syndrome     |
| SJO5        | 1:2560, speckled                 | NEGATIVE                    | NEGATIVE       | ++        |                                 | Sjogren Syndrome     |
| SJO6        | 1:2560, speckled                 | NEGATIVE                    | NEGATIVE       | +++       |                                 | Sjogren Syndrome     |
| RA1         | 1:5120, speckled                 | NEGATIVE                    | NEGATIVE       | ++        |                                 | Rheumatoid Arthritis |
| RA2         | 1:2560, speckled                 | NEGATIVE                    | NEGATIVE       | ++        |                                 | Rheumatoid Arthritis |
| RA3         | 1:1280, homogeneous              | NEGATIVE                    | NEGATIVE       | +         |                                 | Rheumatoid Arthritis |
| RA4         | 1:640, speckled                  | NEGATIVE                    | NEGATIVE       | ++        |                                 | Rheumatoid Arthritis |
| RA5         | 1:640, homogeneous               | NEGATIVE                    | NEGATIVE       | +++       |                                 | Rheumatoid Arthritis |
| RA6         | 1:1280, homogeneous              | NEGATIVE                    | NEGATIVE       | ++        |                                 | Rheumatoid Arthritis |
| RA7         | 1:5120, speckled                 | NEGATIVE                    | NEGATIVE       | +++       |                                 | Rheumatoid Arthritis |
| RA8         | 1:1280, homogeneous              | NEGATIVE                    | NEGATIVE       | +         |                                 | Rheumatoid Arthritis |
| Normal1     | NEGATIVE                         | NEGATIVE                    | NEGATIVE       | NEGATIVE  |                                 | none                 |
| Normal2     | NEGATIVE                         | NEGATIVE                    | NEGATIVE       | NEGATIVE  |                                 | none                 |
| Normal3     | NEGATIVE                         | NEGATIVE                    | NEGATIVE       | +         |                                 | none                 |
| Normal4     | NEGATIVE                         | NEGATIVE                    | NEGATIVE       | NEGATIVE  |                                 | none                 |
| Normal5     | NEGATIVE                         | NEGATIVE                    | NEGATIVE       | NEGATIVE  |                                 | none                 |
| Normal6     | NEGATIVE                         | NEGATIVE                    | NEGATIVE       | NEGATIVE  |                                 | none                 |
| Normal7     | NEGATIVE                         | NEGATIVE                    | NEGATIVE       | NEGATIVE  |                                 | none                 |
| Normal8     | NEGATIVE                         | NEGATIVE                    | NEGATIVE       | NEGATIVE  |                                 | none                 |

Supplementary Figure 1. FcR expression on human PDC. Human PDC were isolated from PBMCs using anti-BDCA-4 microbeads. Surface expression of FcR's was determined by flow cytometry using anti-BDCA-2-FITC and anti-CD16-PE, anti-CD32-PE, or anti-CD64-PE antibodies. Data are representative of 3 similar experiments conducted on 3 different donors.

Supplementary Figure 2. SLE-IC and TLR9 associate. YFP-tagged TLR9 (green) expressing U373 cells were incubated with Alexa Fluor 633-conjugated SLE-IC (red) for 5 or 30 minutes and living cells were imaged by confocal microscopy.

Supplementary Table 1. Summary of patient data and immune complex characterization. Anti-DNA ELISA is negative if anti-DNA IgG is <20 IU/mL, (+) if 30-60 IU/mL, (++) if 60-100 IU/mL, and (+++) if >100 IU/mL. Anti-C1q ELISA is negative if anti-C1q IgG is <40  $\mu$ g/mL, (+) 40-50  $\mu$ g/mL, (++) 50-80  $\mu$ g/mL, (+++) >80  $\mu$ g/mL. The anti-IgG subclass ELISA column demonstrates the IgG subclass distribution of anti-DNA antibodies in SLE patient sera. The average distribution of anti-DNA antibodies in SLE sera (n=12) was 64.3 $\pm$ 8.9% IgG1, 25.5 $\pm$ 7.4% IgG2, 8.8 $\pm$ 6.0% IgG3, 0.8 $\pm$ 1.5% IgG4.
